# Supplementary material
Source: Research Square preprint supplement (doi:10.21203/rs.3.rs-9694297/v1)
Supplement: Supplementary file 1 [file 914c1cb2e7ca4be3b2ab307a.docx]

**Supplementary Video 1**

**RMP-synchronised motion of the coherent edge structure observed by ECE imaging.** The movie shows band-passed-filtered (1-10 kHz) normalised electron-temperature fluctuations, , measured by ECE imaging during the ELM-suppressed phase. During the time interval shown, the applied n = 1 resonant magnetic perturbation (RMP) is stationary. A coherent edge structure moves back and forth in a way that is effectively synchronised with this stationary three-dimensional magnetic field. This behaviour is qualitatively consistent with the nonlinear MHD picture in which the coherent edge structure interacts with the applied three-dimensional field and provides a setting where nonlinear interactions can become active.
